# Supplementary material
Source: Research Square preprint supplement (doi:10.21203/rs.3.rs-9618023/v1)
Supplement: Supplementary file 1 [file d449cfab90aad3cb58a46f45.docx]

**Informed Consent**

This study is being conducted by Daeheon Jegal, a graduate student at the University of Alabama, and Dr. Dana Patton, Associate Professor of Political Science at University of Alabama.

**Study Title**: The role of Moral and Behavioral Immune System in Shaping Attitudes Toward Welfare Policies and Medicaid Expansion During the Covid-19 Pandemic

**Purpose of Study**: This study investigates how the Covid-19 Pandemic has influenced people’s attitudes toward government support policies, focusing on Medicaid expansion and welfare policies. Using morals and the behavioral immune system as theoretical frameworks, it explores how exposure to pandemic-related experiences affects public opinion toward Medicaid expansion and welfare policies. By understanding these dynamics, the research aims to provide insights for policymakers navigating societal responses during and after the pandemic.

**Who Can Participate**: If you are aged 19 or older and are currently enrolled Amazon Mechanical Turk, you are eligible to participate.

**Procedure**: In order to participate you need to complete this online survey. Your participation in this online survey is completely anonymous. No information you share electronically can be traced to you or the computer you used. Your participation in the survey indicates you read this consent information and agreed to participate in this anonymous survey. Depending upon the depth of your responses, participation time caries from 20 minutes to 45 minutes.

**Risks of Being in the Study**: Some individuals may experience temporary discomfort if they remembered adversities during Covid-19. It is expected that there is no direct risk that affects the participants.

**Potential benefit**: There are no direct benefits to subjects. The benefits to society would be that policymakers may take such research into account when they make or evaluate welfare policies and Medicaid expansion.

**Compensation**: Each participant will receive 50 cents for completing the survey. Amazon Mechanical Turk does not allow prorated compensation.

**Anonymity**: Your participation in this research is completely anonymous. No information you share can be traced electronically to you, the computer you used, nor can you be traced by any information you provide. Data will be kept stored in the on-line survey site’s databank. Only Daeheon Jegal and Dr. Dana Patton will have access to the data.

**Contacts and Questions**: If you have questions about this study, you may contact either: Daeheon Jegal, Ph.D., at: 659-210-9290 or you may email him at [djegal@crimson.ua.edu](mailto:djegal@crimson.ua.edu). For questions regarding your rights as a participant in this research or IRB approval, contact Dr. Dana Patton, Associate of Political Science, at 205-348-4911 or by email at [dana.patton@ua.edu](mailto:dana.patton@ua.edu).

**Consent**: I have read and understand the above consent form. I certify that I am 19 years old or older. By Clicking the “Next” button to enter the survey, I indicate my willingness to take part in this study.

**Survey Questionnaires**

**Covid-19 experience (CCES)**

1. Have you or someone you know been diagnosed with the coronavirus (Covid-19) during the past few years? (select all that apply) (Allow multiple selections)
   1. Yes, I have
   2. Yes, a family member
   3. Yes, a friend
   4. Yes, a co-worker
   5. No, I do not know anyone who has been diagnosed
2. Do you know anyone who died from coronavirus (Covid-19)? (select that apply) (Allow multiple selections)
   1. Yes, a family member
   2. Yes, a friend
   3. Yes, a co-worker
   4. No, I do not know anyone who has died from coronavirus
3. How did your work status change during pandemic as a result of the coronavirus pandemic? (select all that apply) (Allow multiple selections)
   1. My hours had been reduced
   2. My hours were reduced, but they had been restored
   3. I had been temporarily laid off
   4. I was temporarily laid off, but have now been re-hired
   5. I had more than one job before the pandemic, and lost one of them
   6. I lost my job
   7. I was not working when the pandemic began
   8. My hours had increased
   9. I had taken additional jobs since the pandemic
   10. No, nothing about my work had changed

**Humanitarian values (Interpersonal Reactivity Index, M.H.Davis, 1980)**

We will use the Empathic concern subscale of the Interpersonal reactivity Index (IRI). Scores on this subscale are computed by averaging five items. This subscale measures other-oriented feelings of compassion for the misfortune of others. Items were rated along a 5-point scale ranging from 1 (*does not describe me well*) to 5 (*described me extremely well*).

1. When I see someone being taken advantage of, I feel kind of protective toward them.
2. When I see someone being treated unfairly, I sometimes don’t feel very much pity for them. (-)
3. I often have tender, concerned feelings for people less fortunate than me.
4. I would describe myself as a pretty soft-hearted person.
5. Sometimes I don’t feel sorry for other people when they are having problems. (-)
6. Other people’s misfortunes do not usually disturb me a great deal. (-)
7. I am often quite touched by things that I see happen.

(-) denotes item to be scored in reverse fashion

Source: Davis, M. H. (1980). A multidimensional approach to individual differences in empathy.

**Behavioral immune system**

All ratings of the item are made on a scale between 1 (“strongly disagree”) and 7(“strongly agree”). A composite score for each subscale will be created by taking the average of the items. Higher scores reflect greater germ aversion or perceived infectability.

1. I prefer to wash my hands pretty soon after shaking someone’s hand.
2. I avoid using public telephones because of the risk that I may catch something from the previous user.
3. I do not like to write with a pencil someone else has obviously chewed on.
4. I dislike wearing used clothes because you do not know what the last person who wore it was like.
5. I am comfortable sharing a water bottle with a friend.
6. It really bothers me when people sneeze without covering their mouths.
7. It does not make me anxious to be around sick people.
8. My hands do not feel dirty after touching money.
9. In general, I am very susceptible to colds, flu and other infectious diseases.
10. I am unlikely to catch a cold, flu or other illness, even if it is ‘going around’.
11. If an illness is ‘going around’, I will get it.
12. My immune system protects me from most illnesses that other people get.
13. I am more likely than the people around me to catch an infectious disease.
14. My past experiences make me believe I am not likely to get sick even when my friends are sick.
15. I have a history of susceptibility to infectious disease.

Germ Aversion = 1, 2, 3, 4, 5, 6, 7, and 8

Perceived Infectability = 9, 10, 11, 12, 13, 14, and 15

Source: Duncan, L. A., Schaller, M., & Park, J. H. (2009). Perceived vulnerability to disease: Development and validation of a 15-item self-report instrument. *Personality and Individual differences*, *47*(6), 541-546.

**Racial Resentment Scale (Feldman and Huddy, 2005)**

Do you [agree strongly, agree somewhat, neither agree nor disagree, disagree somewhat, or disagree strongly] with the following statement?

1. Irish, Italian, and Jewish ethnicities overcame prejudice and worked their way up. Blacks should do the same without any special favors.’
2. Generations of slavery and discrimination have created conditions that make it difficult for blacks to work their way out of the lower class.’
3. Over the past few years, blacks have gotten less than they deserve.’
4. It’ really a matter of some people just not trying hard enough; if black would only try harder they could be just as well off as whites.’
5. Government officials usually pay less attention to a request or complaint from a black person than from a white person.
6. Most blacks who receive money from welfare programs could get along without it if they tried.

Source: ANES, Kinder, D. R., & Sanders, L. M. (1996). *Divided by color: Racial politics and democratic ideals*. University of Chicago Press.

**Welfare policies and Medicaid expansion**

1. Should federal spending on welfare programs be increased, decreased, or kept the same?
   1. A lot increased
   2. A little increase
   3. Kept the same
   4. A little decreased
   5. A lot decreased
2. Do you think the government should be responsible for ensuring a minimum standard of living for all citizens?
   1. Strongly agree
   2. Agree
   3. Neutral
   4. Disagree
   5. Strongly disagree
3. State legislatures must make choices when making spending decisions on important state programs. How would you like your legislature to spend money on Welfare/Health care area?
   1. Greatly increase
   2. Slightly increase
   3. Maintain
   4. Slightly decrease
   5. Greatly decrease
4. Do you approve, disapprove, or neither approve nor disapprove of the Affordable Care Act of 2010, sometimes called Obamacare?
   1. Approve
   2. Disapprove
   3. Neither approve nor disapprove
5. Do you support or oppose your state expanding Medicaid to cover more low-income adults under the Affordable Care Act (Obamacare)?
   1. Strongly support
   2. Somewhat support
   3. Neither support nor oppose
   4. Somewhat oppose
   5. Strongly oppose
   6. Don’t know/Refused
6. How important do you think it is for your state to expand Medicaid to provide health insurance to more low-income adults?
   1. Very important
   2. Somewhat important
   3. Not too important
   4. Not at all important
   5. Don’t know/Refused
7. How much do you trust the federal government to handle healthcare policy effectively?
   1. A great deal
   2. A fair amount
   3. Not too much
   4. Not at all
   5. Don’t know/Refused
8. Have you or someone in your household ever been enrolled in Medicaid?
   1. Yes
   2. No
   3. Don’t know/Refused

**Demographic**

1. Is the respondent male or female?
   1. Male
   2. Female
2. Where do you currently reside (State)?
3. What is your age?
   1. 19 – 20
   2. 21 – 30
   3. 31 – 40
   4. 41 – 50
   5. 51 – 60
   6. 61 – 70
   7. 71 – 80
   8. 80 older
4. With which ethnic or racial group do you identify?
   1. Whites
   2. Blacks
   3. Hispanic Americans
   4. Hispanics
   5. Asian Americans
   6. Asian
   7. Muslim
   8. Others
5. Where would you place yourself on this scale, or haven’t you thought much about this?
   1. Extremely liberal
   2. Liberal
   3. Slightly liberal
   4. Moderate; middle of the road
   5. Slightly conservative
   6. Conservative
   7. Extremely conservative
6. Generally speaking, do you usually think of yourself as a Democrat, a Republican, an independent, or what?
   1. No preference
   2. Democrat
   3. Republican
   4. Independent
   5. Other party
